# Supplementary material
Source: PubMed Central journal article supplement (PMC6865672)
Supplement: HBM-40-2422-s001.pdf [file HBM-40-2422-s001.pdf]

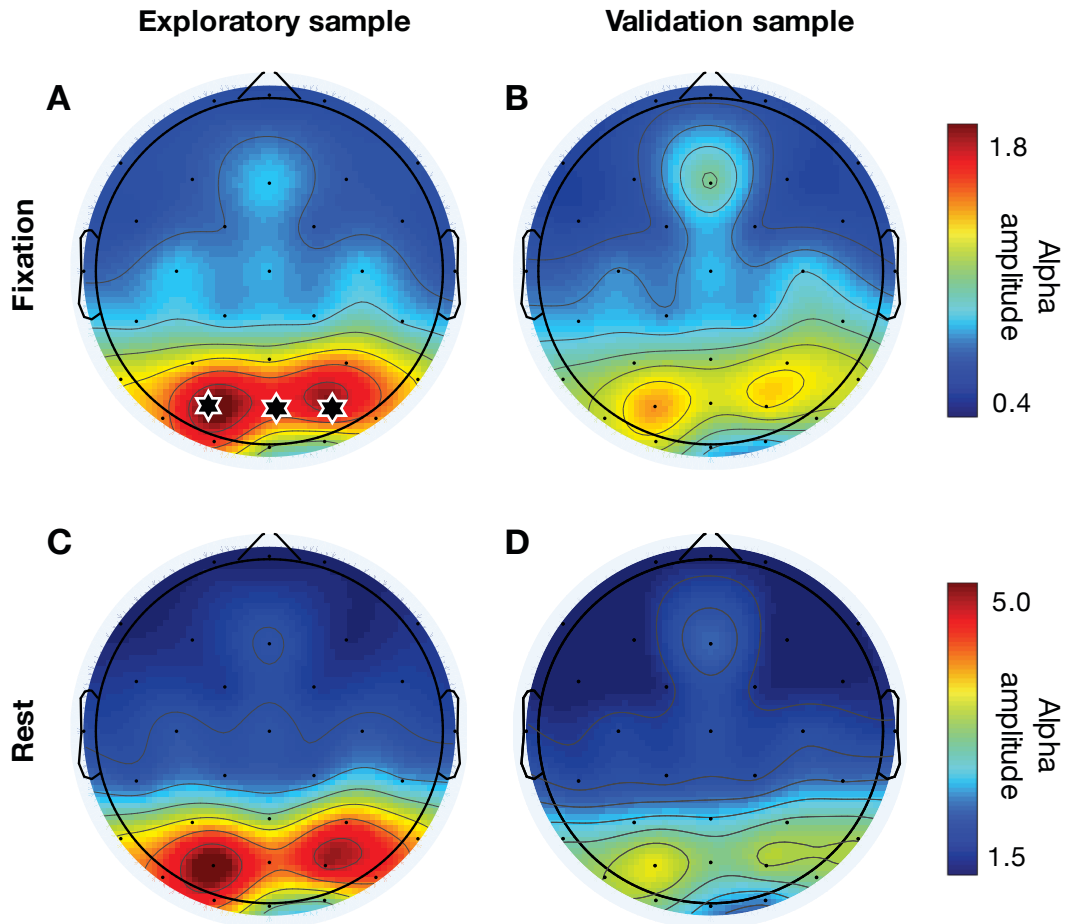

Supplementary Figure 1. Scalp topographies of alpha amplitude during fixation for the A) exploratory sample, B) validation sample, and during rest for the C) exploratory sample, D) validation sample. Stars in A) indicate the parieto-occipital electrodes (PO<sub>3</sub>, PO<sub>2</sub>, PO<sub>4</sub>) over which we averaged the alpha frequency and amplitude data for the exploratory sample.

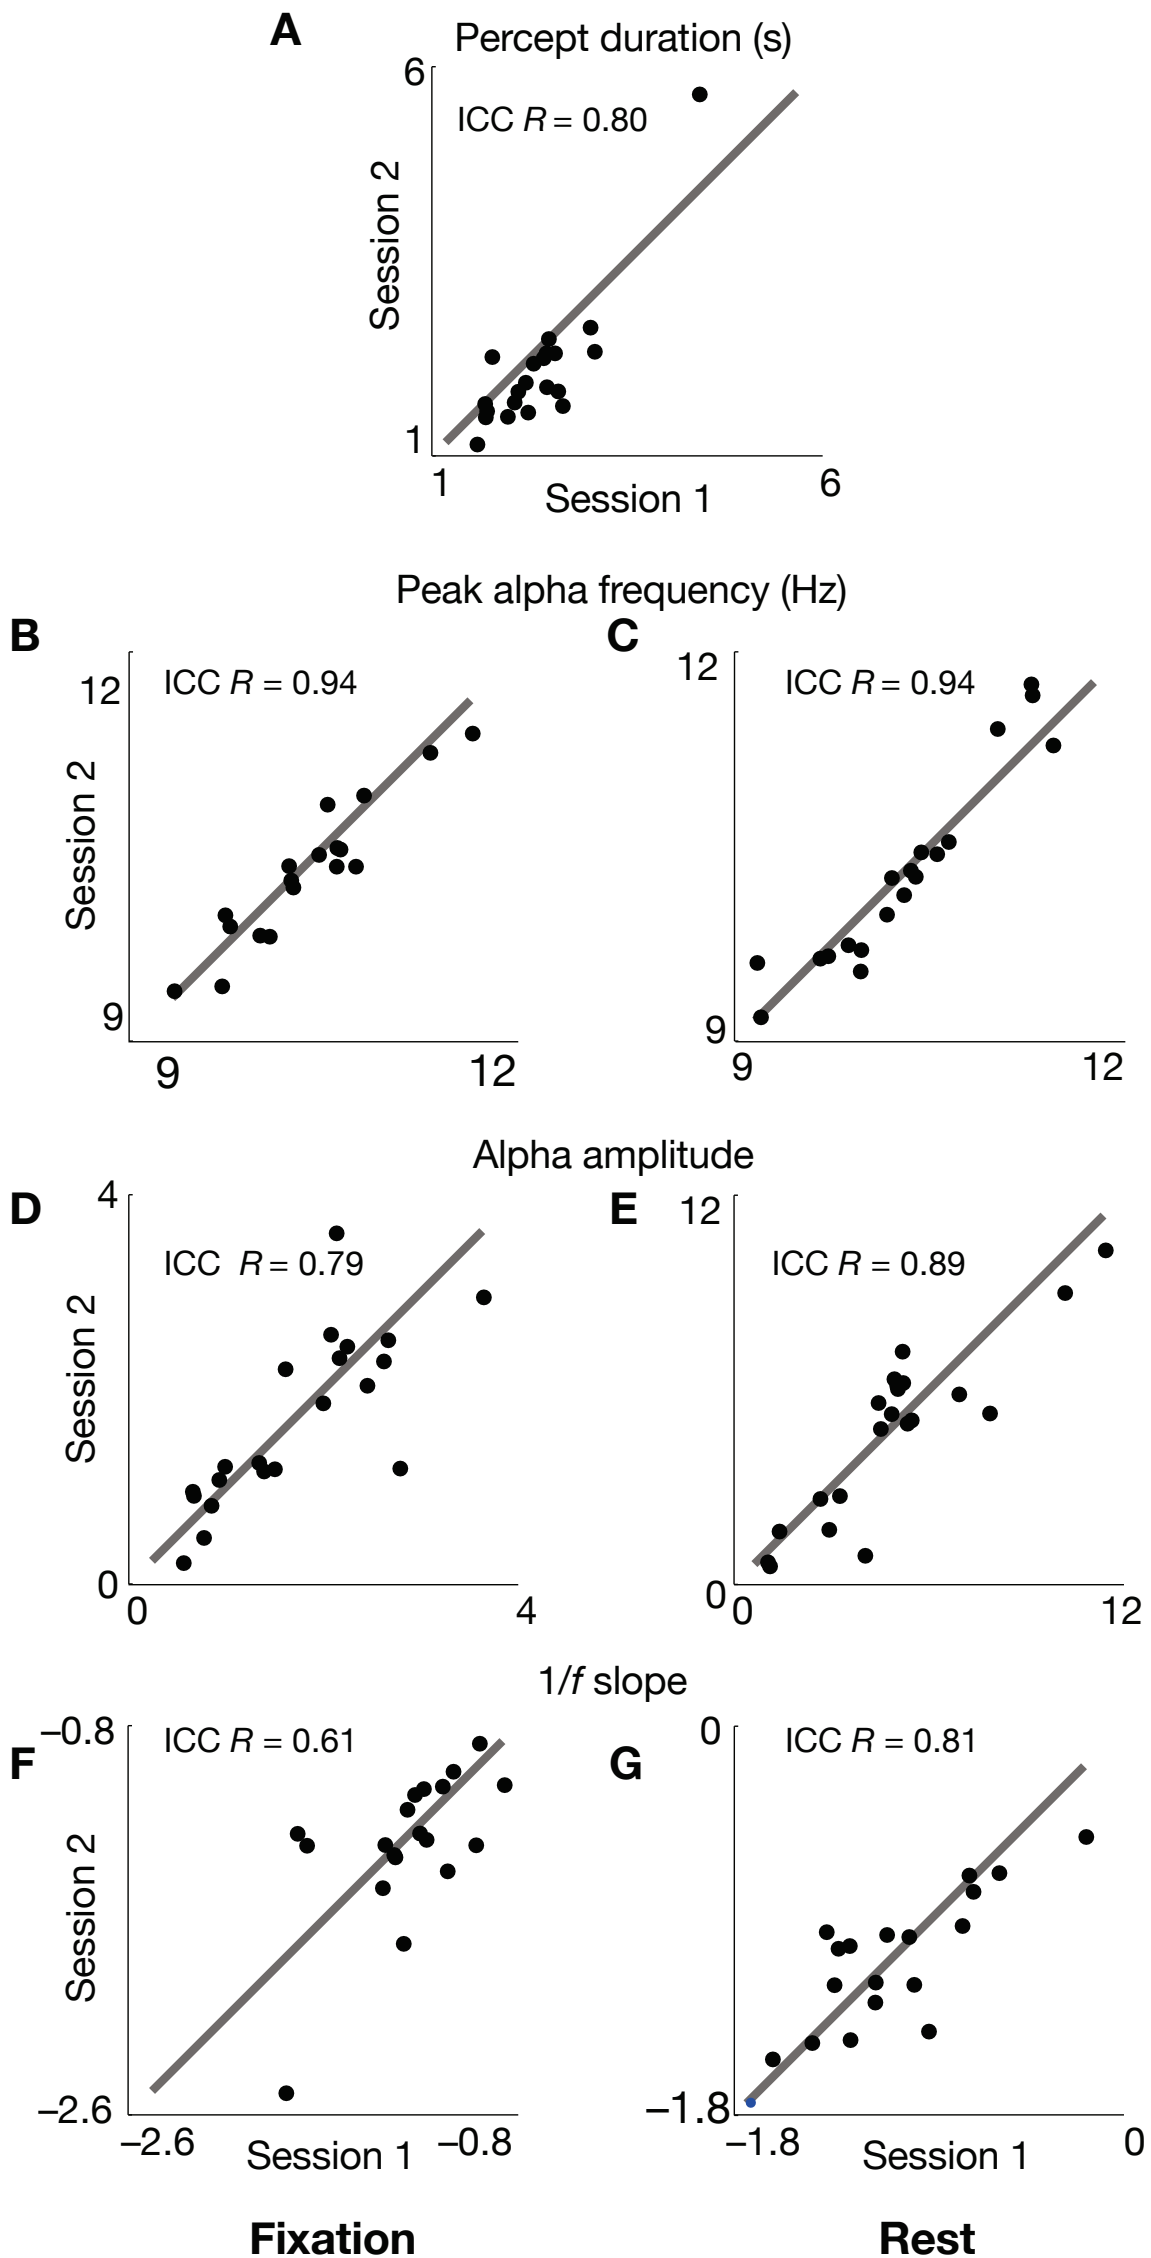

Supplementary Figure 2. Session-to-session reliability for: A) Stable percept duration. B, C) Peak alpha frequency. D, E) Alpha amplitude. F, G) 1/f slope. B,D,F) During fixation. C,E,G) During rest.

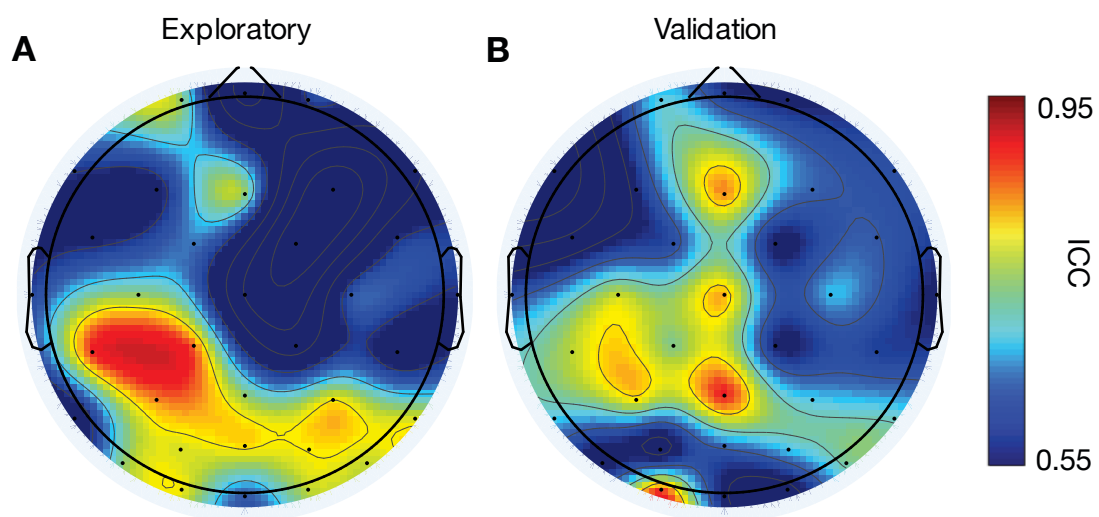

Supplementary Figure 3. Scalp Topographies of the intraclass coefficient (ICC) between peak alpha frequency during fixation and rest for the A) exploratory, and B) validation samples.
